# Supplementary material for: Development and Validation of a Canine Health-Related Quality of Life Questionnaire and a Human–Canine Bond Questionnaire for Use in Veterinary Practice
Source: MDPI journal article supplement (doi:10.3390/ani13203255), 2023-10-18
Supplement: s1 [file s1]

Supplemental Table S1. Sociodemographic Characteristics of Focus Group Participants.

| Characteristic          | N (%)   |
|-------------------------|---------|
|                         | N = 20  |
| Sex                     |         |
| Female                  | 16 (80) |
| Male                    | 4 (20)  |
| Age                     |         |
| Mean age                | 45      |
| Age range               | 27–60   |
| Race/Ethnicity          |         |
| White/European-American | 16 (80) |
| Black/African-American  | 2 (10)  |
| Asian/Asian-American    | 1 (5)   |
| Mixed                   | 1 * (5) |
| Latino/Hispanic         | 0 (0)   |

\* The participant self-described themselves as White and American Indian.

Supplemental Table S2. Sociodemographic Characteristics of Focus Group Participants' Dogs.

| Characteristic             | N (%)   |
|----------------------------|---------|
|                            | N = 25  |
| Age                        |         |
| Mean age                   | 7.3     |
| Age range                  | 1–17.75 |
| Time spent caring for dog  |         |
| 1–5 years                  | 11 (44) |
| 5–10 years                 | 8 (32)  |
| Over 10 years              | 6 (24)  |
| Frequency of vet visits    |         |
| Every month                | 3 (12)  |
| Every 6–8 weeks            | 1 (4)   |
| Every 3–6 months           | 4 (24)  |
| Twice per year             | 5 (20)  |
| Once per year              | 9 (36)  |
| As needed                  | 1 (4)   |
| Training                   |         |
| Service dog training       | 0 (0)   |
| Therapy dog training       | 1 (4)   |
| Citizen training           | 1 (4)   |
| Emotional support training | 1 (4)   |
| Health status              |         |
| Healthy                    | 17 (68) |
| Unhealthy                  | 8 (32)  |

Supplemental Table S3. Sociodemographic Characteristics for Cognitive Interview Participants.

| Characteristic                     | N (%)    |
|------------------------------------|----------|
|                                    | N = 16   |
| Sex                                |          |
| Female                             | 9 (56)   |
| Male                               | 7 (44)   |
| Age                                |          |
| Mean age                           | 49       |
| Age range                          | 20–58    |
| Race/Ethnicity                     |          |
| White/European-American            | 8 (50)   |
| Black/African-American             | 3 (17)   |
| Asian/Asian-American               | 1 (6)    |
| Native American/Alaskan Native     | 1 (6)    |
| Native Hawaiian/Pacific Islander   | 1 (6)    |
| Mixed                              | 2 * (13) |
| Latino/Hispanic                    | 1 (6)    |
| Marriage status                    |          |
| Married                            | 6 (38)   |
| Single, not living with partner    | 5 (31)   |
| Partnership/cohabitating           | 4 (25)   |
| Widowed                            | 1 (6)    |
| Employment status                  |          |
| Working full-time                  | 9 (56)   |
| Working part-time                  | 3 (17)   |
| Student                            | 3 (17)   |
| Retired                            | 1 (6)    |
| Highest level of education         |          |
| Some college                       | 4 (25)   |
| 2-year Associate's degree          | 2 (13)   |
| 4-year Bachelor's degree           | 5 (31)   |
| Master's degree                    | 4 (24)   |
| Doctoral or professional degree    | 1 (6)    |
| Income level                       |          |
| Less than \$30,000                 | 2 (13)   |
| \$30,000-\$59,999                  | 5 (31)   |
| \$60,000-\$89,999                  | 5 (31)   |
| \$90,000-\$119,999                 | 1 (6)    |
| \$120,000-\$149,999                | 2 (13)   |
| \$150,000 or more                  | 1 (6)    |
| Children under 18 in the household |          |
| Yes                                | 5 (31)   |
| No                                 | 11 (69)  |

\* The participants self-reported themselves as Black/African-American and White/European-American, and Black/African American and Native American/Alaskan Native.
